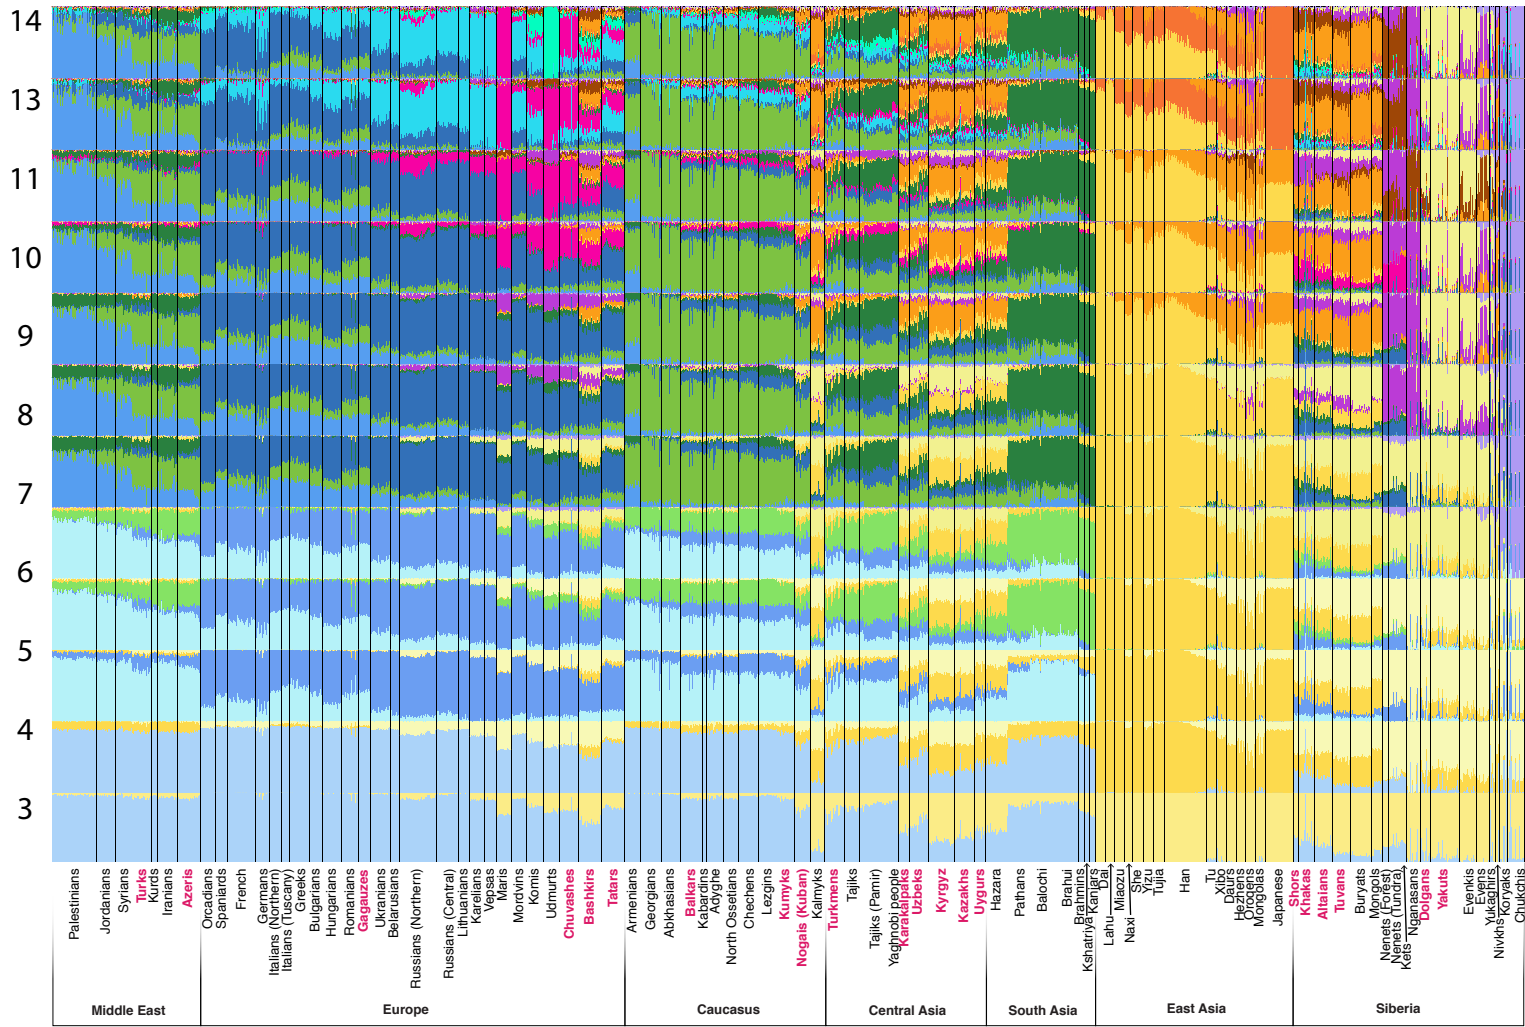

Source: http://biorxiv.org/content/biorxiv/suppl/2014/08/13/005850.DC2/005850-1.pdf
